# Supplementary material
Source: publisher figshare collection journal article supplement (https://frontiersin.figshare.com/ndownloader/files/34819282)
Supplement: Supplementary file 1 [file 34819282]

Table S2. Replacement of original species by sequence of related species

| Scientific Name | Accession Number | | | Related species |
| --- | --- | --- | --- | --- |
| ITS | matK | rbcl |
| *Abelia buddleioides* | MH711265.1 | MH659726.1 | HQ680729.1 | *Abelia dielsii* |
| *Abies georgei* var. *smithii* | / | MH230847.1 | JF940588.1 | *Abies georgei* |
| *Armeniaca holosericea* | JF978096.1 | KP089844.1 | KF154869.1 | *Armeniaca vulgaris* |
| *Asparagus myriacanthus* | / | KY457631.1 | KC704791.1 | *Asparagus cochinchinensis* |
| *Berberis jamesiana* | AH013465.2 | MH659853.1 | MH658375.1 | *Berberis circumserrata* |
| *Berberis tsarica* | GU934674.1 | / | / | *Berberis griffithiana* |
| *Campylotropis brevifolia* | / | JN402957.1 | KY702629.1 | *Campylotropis delavayi* |
| *Campylotropis yunnanensis* var. *filipes* | JN402491.1 | JN402958.1 | / | *Campylotropis hirtella* |
| *Caryopteris forrestii* var*. Minor* | MF801670.1 | MF801707.1 | MF801761.1 | *Caryopteris forrestii* |
| *Ceropegia stenophylla* | MT056130.1 | / | KX910831.1 | *Ceropegia pubescens* |
| *Jasminum nudiflorum* var. *pulvinatum* | MH711706.1 | MH658830.1 | / | *Jasminum nudiflorum* |
| *Lonicera litangensis* | GQ268165.1 | MH659859.1 | MK136965.1 | *Lonicera tangutica* |
| *Pertya phylicoides* | MH711279.1 | MH659741.1 | / | *Pertya sinensis* |
| *Rabdosia parvifolia* | KF855426.1 | / | / | *Rabdosia lihsienensis* |
| *Rhamnella forrestii* | / | LC548596.1 | KP121457.1 | *Rhamnella franguloides* |
| *Sabina pingii* var. *wiisonii* | / | JF954220.1 | JF942135.1 | *Sabina pingii* |
| *Sabina tibetica* | AY836796.1 | KJ661402.1 | HM024333.1 | *Sabina vulgaris* |
| *Salix ernestii form. glabrescens* | KC415531.1 | KC415417.1 | KC415361.1 | *Salix qinghaiensis* |
| *Sorbus rehderiana* | FJ810032.1 | MH116871.1 | MH116422.1 | *Sorbus prattii* |
| *Cynanchum decipiens* | FJ572055.1 | / | / | *Cynanchum acutum* |
